# Supplementary material
Source: ML conference proceedings conference paper supplement (https://openreview.net/forum?id=fV8CfTjnXgH)
Supplement: supplementary_material [file attachment]

## A Appendix

### A.1 Squeeze and excitation network

We adapt the SE block from work [6] to process 1D data and only use it for the first layer. The SE block mainly consists of two parts: (1) a squeeze net  $F_{sq}(\cdot)$ , which in our case is a adaptive average pooling which reduces  $T$  timesteps to 1 with a learnable kernel. (2) an excitation net  $F_{ex}(\cdot, W)$ , in our case a fully connected network which can be represented as  $F_{ex}(\cdot, W) = \text{Sigmoid}(W_2(\text{ReLU}(W_1(X'))))$  where  $W_1 \in \mathbb{R}^{C|16 \times C}$ ,  $W_2 \in \mathbb{R}^{C \times C|16}$ . It takes the output of the squeeze net  $X'$  as input and generates channel-wise scaling factors  $s \in \mathbb{R}^{1 \times C}$ . These scaling factors are then multiplied channel-wise with the original input  $X$ . Figure 5 shows an illustration of the adapted SE block we use in this work.

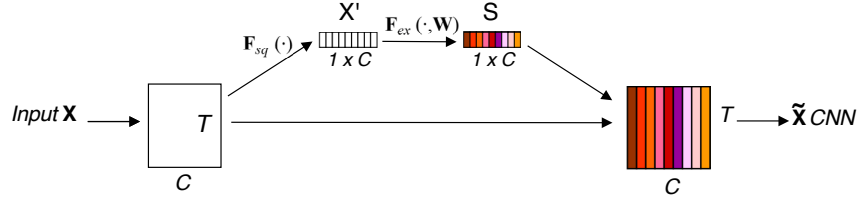

Figure 5: SE block on the input layer to determine the scaling factors of the channels. This figure is adapted from [6].

### A.2 Random electrode selection

Some electrodes were implanted further away from the location where the stimulus was placed. We filter out these electrodes before doing a random selection for the random electrode selection experiments in Figure 4.

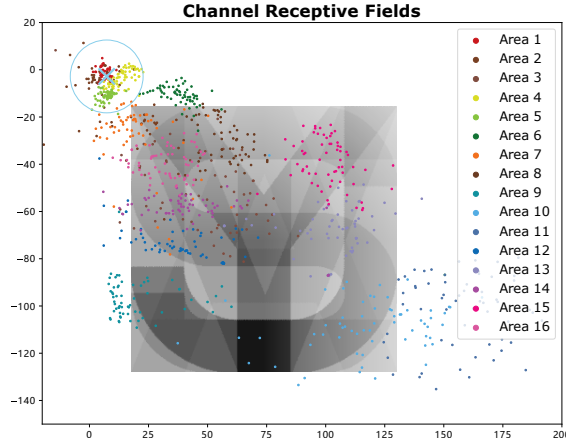

Figure 6: An example electrode whose receptive field (RF) does not overlap with the position where the visual stimuli is placed. The light blue cross marks the RF center of a specific electrode and the light blue circle marks the RF extent. Figure is adapted from [4].

### A.3 Choosing important electrodes

Figure 7 shows the top-k important electrodes determined by ranking the channel importance weights of the SE-module used in Figure 4.

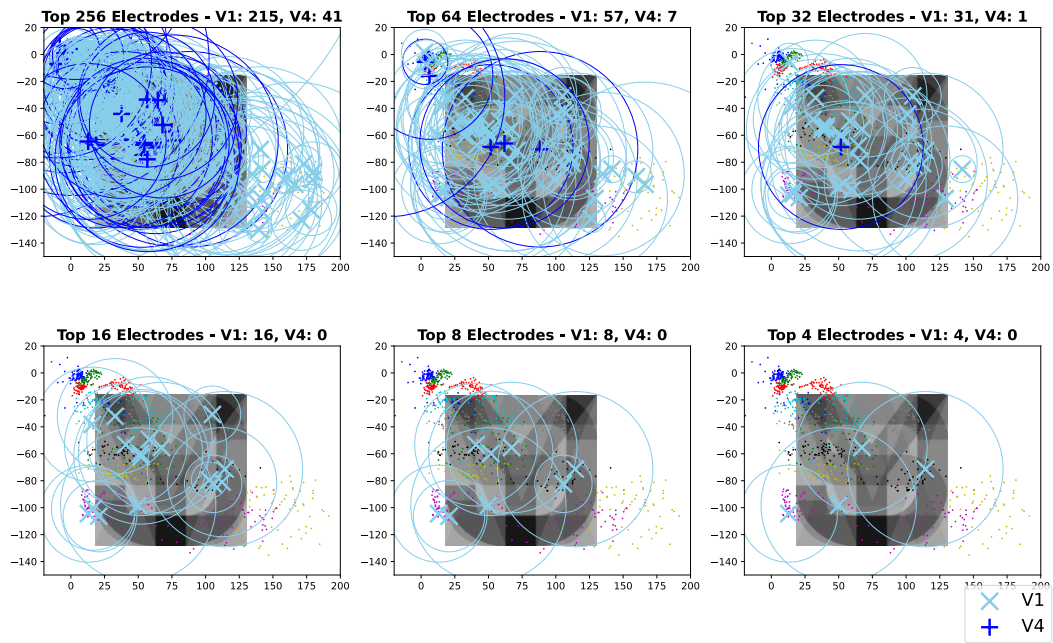

Figure 7: The receptive fields of the top-k most important electrodes corresponding to those with the largest SE scaling factors.
